# Supplementary material
Source: publisher site journal article supplement (http://www.kjim.org/upload/media/kjim-2022-369-Supplementary-Fig-1.pdf)
Supplement: Supplementary file 1 [file kjim-2022-369-Supplementary-Fig-1.pdf]

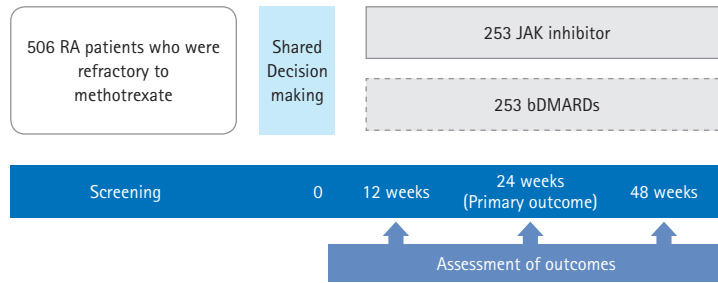

**Supplementary Figure 1.** Study design. RA, rheumatoid arthritis; bDMARDs, biologic disease-modifying antirheumatic drugs.
